# Supplementary material
Source: publisher figshare collection journal article supplement (https://asha.figshare.com/articles/dataset/_/25209248)
Supplement: Supplementary file 1 [file 1]

## Sheet: Sheet1
Supplemental material, Carlie et al., "The Effect of Background Noise, Bilingualism, Socioeconomic Status, and Cognitive Functioning on Primary School Children’s Narrative Listening Comprehension," JSLHR, https://doi.org/10.1044/2023_JSLHR-22-00637
Supplemental Material S2. Description of how the questions the caregivers were asked were used to create the Swedish exposure index.
Question	Response	Statement	Scoring	Points
Do you as a family speak Swedish at home?	Yes	Swedish is spoken at home	Yes	1
	No		No	0
Do you as a family speak another language than Swedish at home?	Yes	Monolingual Swedish speaker	No	0
	No		Yes	1
Has your child always spoken Swedish?	Yes	Always spoken Swedish/Swedish as L1	Yes	1
	No		No	0
If no, how old was your child when they started speaking Swedish?*	Age of acquisition in years*	Duration of Swedish exposure < 3 years	Yes	0
		Duration of Swedish exposure > 3 years	Yes	1
		Duration of Swedish exposure > 6 years	Yes	1
Total (min-max)				0-5
*Duration of exposure was calculated by subtracting age of acquisition from the current age. For children who had always spoken Swedish, their duration of Swedish exposure was equivalent to their current age. Children who had spoken Swedish for > 6 years were awarded 2 points - 1 point for > 3 years and 1 point for > 6 years.
