# Supplementary material
Source: publisher figshare collection journal article supplement (https://asha.figshare.com/articles/dataset/_/25209248)
Supplement: Supplementary file 1 [file 1]

**Supplemental Material S1.** Pearson correlations between the continuous predictor variables: age (in months), performance on the digit span backwards task (DSBW) and the crosslinguistic nonword repetition test (CL-NWRT), and the children's degree of Swedish exposure.

|                  |                    | Age  | DSBW | CL-NWRT | Swedish exposure |
|------------------|--------------------|------|------|---------|------------------|
| Age              | Pearson's <i>r</i> | —    |      |         |                  |
|                  | <i>p</i> -value    | —    |      |         |                  |
| DSBW             | Pearson's <i>r</i> | .094 | —    |         |                  |
|                  | <i>p</i> -value    | .389 | —    |         |                  |
| CL-NWRT          | Pearson's <i>r</i> | .008 | .194 | —       |                  |
|                  | <i>p</i> -value    | .943 | .073 | —       |                  |
| Swedish exposure | Pearson's <i>r</i> | .030 | .026 | .197    | —                |
|                  | <i>p</i> -value    | .780 | .812 | .069    | —                |

Note. \* $p < .05$ . \*\* $p < .01$ . \*\*\* $p < .001$ .
